# Supplementary material
Source: HighWire-hosted journal article supplement (https://www.life-science-alliance.org/content/6/3/e202201583/F6)
Supplement: inline-supplementary-material-5 [file inline-supplementary-material-5.pdf]

**A.**

| <b>Replicate1.</b> | <b>Cx3cl1 Ct</b> | <b>Cx3cl1 Ct mean</b> | <b>RPL7 Ct</b> | <b>RPL7 Ct mean</b> | <b>ΔCt</b> | <b>ΔΔCt</b> | <b>RQ(2<sup>-ΔΔCt</sup>)</b> |
|--------------------|------------------|-----------------------|----------------|---------------------|------------|-------------|------------------------------|
| TS                 | 24.94            | 24.94333333           | 15.58          | 15.57666667         | 9.366667   | 0           | 1                            |
|                    | 24.94            |                       | 15.57          |                     |            |             |                              |
|                    | 24.95            |                       | 15.58          |                     |            |             |                              |
| Diff               | 23.81            | 23.81333333           | 15.96          | 15.94               | 7.873333   | -1.49333    | 2.815387168                  |
|                    | 23.82            |                       | 15.9           |                     |            |             |                              |
|                    | 23.81            |                       | 15.96          |                     |            |             |                              |
| <b>Replicate2.</b> | <b>Cx3cl1 Ct</b> | <b>Cx3cl1 Ct mean</b> | <b>RPL7 Ct</b> | <b>RPL7 Ct mean</b> | <b>ΔCt</b> | <b>ΔΔCt</b> | <b>RQ(2<sup>-ΔΔCt</sup>)</b> |
| TS                 | 24.98            | 24.97                 | 15.65          | 15.63               | 9.34       | 0           | 1                            |
|                    | 24.97            |                       | 15.6           |                     |            |             |                              |
|                    | 24.96            |                       | 15.64          |                     |            |             |                              |
| Diff               | 23.88            | 23.87666667           | 15.91          | 15.91               | 7.966667   | -1.37333    | 2.590684504                  |
|                    | 23.87            |                       | 15.9           |                     |            |             |                              |
|                    | 23.88            |                       | 15.92          |                     |            |             |                              |
| <b>Replicate3.</b> | <b>Cx3cl1 Ct</b> | <b>Cx3cl1 Ct mean</b> | <b>RPL7 Ct</b> | <b>RPL7 Ct mean</b> | <b>ΔCt</b> | <b>ΔΔCt</b> | <b>RQ(2<sup>-ΔΔCt</sup>)</b> |
| TS                 | 25               | 25.02                 | 15.56          | 15.55333333         | 9.466667   | 0           | 1                            |
|                    | 25.02            |                       | 15.5           |                     |            |             |                              |
|                    | 25.04            |                       | 15.6           |                     |            |             |                              |
| Diff               | 23.95            | 23.94                 | 15.95          | 15.93               | 8.01       | -1.45667    | 2.744734621                  |
|                    | 23.95            |                       | 15.9           |                     |            |             |                              |
|                    | 23.92            |                       | 15.94          |                     |            |             |                              |
| <b>Replicate1.</b> | <b>C-kit Ct</b>  | <b>C-kit Ct mean</b>  | <b>RPL7 Ct</b> | <b>RPL7 Ct mean</b> | <b>ΔCt</b> | <b>ΔΔCt</b> | <b>RQ(2<sup>-ΔΔCt</sup>)</b> |
| TS                 | 26.6             | 26.56666667           | 15.55          | 15.55666667         | 11.01      | 0           | 1                            |
|                    | 26.5             |                       | 15.57          |                     |            |             |                              |
|                    | 26.6             |                       | 15.55          |                     |            |             |                              |
| Diff               | 21.9             | 21.91                 | 15.63          | 15.62333333         | 6.286667   | -4.72333    | 26.41587573                  |
|                    | 21.92            |                       | 15.6           |                     |            |             |                              |
|                    | 21.91            |                       | 15.64          |                     |            |             |                              |
| <b>Replicate2.</b> | <b>C-kit Ct</b>  | <b>C-kit Ct mean</b>  | <b>RPL7 Ct</b> | <b>RPL7 Ct mean</b> | <b>ΔCt</b> | <b>ΔΔCt</b> | <b>RQ(2<sup>-ΔΔCt</sup>)</b> |
| TS                 | 26.3             | 26.2                  | 15.45          | 15.43333333         | 10.76667   | 0           | 1                            |
|                    | 26.3             |                       | 15.45          |                     |            |             |                              |
|                    | 26               |                       | 15.4           |                     |            |             |                              |
| Diff               | 21.89            | 21.88666667           | 15.86          | 15.84666667         | 6.04       | -4.72667    | 26.47697993                  |
|                    | 21.88            |                       | 15.8           |                     |            |             |                              |
|                    | 21.89            |                       | 15.88          |                     |            |             |                              |

| <b>A.</b>          |                 | Cont.                |                |                     |            |             |                               |  |
|--------------------|-----------------|----------------------|----------------|---------------------|------------|-------------|-------------------------------|--|
| <b>Replicate3.</b> | <b>C-kit Ct</b> | <b>C-kit Ct mean</b> | <b>RPL7 Ct</b> | <b>RPL7 Ct mean</b> | <b>ΔCt</b> | <b>ΔΔCt</b> | <b>RQ(2<sup>^-ΔΔCt</sup>)</b> |  |
| TS                 | 26.5            | 26.52                | 15.91          | 15.9                | 10.62      | 0           | 1                             |  |
|                    | 26.52           |                      | 15.9           |                     |            |             |                               |  |
|                    | 26.54           |                      | 15.89          |                     |            |             |                               |  |
| Diff               | 21.5            | 21.54                | 15.5           | 15.53666667         | 6.003333   | -4.61667    | <b>24.53325351</b>            |  |
|                    | 21.52           |                      | 15.6           |                     |            |             |                               |  |
|                    | 21.6            |                      | 15.51          |                     |            |             |                               |  |
| <b>Replicate1.</b> | <b>Mmp9 Ct</b>  | <b>Mmp9 Ct mean</b>  | <b>RPL7 Ct</b> | <b>RPL7 Ct mean</b> | <b>ΔCt</b> | <b>ΔΔCt</b> | <b>RQ(2<sup>^-ΔΔCt</sup>)</b> |  |
| TS                 | 22.05           | 22.05                | 16             | 16.01666667         | 6.033333   | 0           | 1                             |  |
|                    | 22              |                      | 16.05          |                     |            |             |                               |  |
|                    | 22.1            |                      | 16             |                     |            |             |                               |  |
| Diff               | 25.76           | 25.76                | 16.46          | 16.44               | 9.32       | 3.286667    | <b>0.10247425</b>             |  |
|                    | 25.77           |                      | 16.42          |                     |            |             |                               |  |
|                    | 25.75           |                      | 16.44          |                     |            |             |                               |  |
| <b>Replicate2.</b> | <b>Mmp9 Ct</b>  | <b>Mmp9 Ct mean</b>  | <b>RPL7 Ct</b> | <b>RPL7 Ct mean</b> | <b>ΔCt</b> | <b>ΔΔCt</b> | <b>RQ(2<sup>^-ΔΔCt</sup>)</b> |  |
| TS                 | 22.06           | 22.06666667          | 16.01          | 16.02666667         | 6.04       | 0           | 1                             |  |
|                    | 22.08           |                      | 16.05          |                     |            |             |                               |  |
|                    | 22.06           |                      | 16.02          |                     |            |             |                               |  |
| Diff               | 25.74           | 25.74666667          | 16.7           | 16.73333333         | 9.013333   | 2.973333    | <b>0.127331976</b>            |  |
|                    | 25.74           |                      | 16.75          |                     |            |             |                               |  |
|                    | 25.76           |                      | 16.75          |                     |            |             |                               |  |
| <b>Replicate3.</b> | <b>Mmp9 Ct</b>  | <b>Mmp9 Ct mean</b>  | <b>RPL7 Ct</b> | <b>RPL7 Ct mean</b> | <b>ΔCt</b> | <b>ΔΔCt</b> | <b>RQ(2<sup>^-ΔΔCt</sup>)</b> |  |
| TS                 | 22.21           | 22.22333333          | 16.04          | 16.03333333         | 6.19       | 0           | 1                             |  |
|                    | 22.24           |                      | 16             |                     |            |             |                               |  |
|                    | 22.22           |                      | 16.06          |                     |            |             |                               |  |
| Diff               | 25.77           | 25.77666667          | 16.92          | 16.94               | 8.836667   | 2.646667    | <b>0.159688612</b>            |  |
|                    | 25.77           |                      | 16.94          |                     |            |             |                               |  |
|                    | 25.79           |                      | 16.96          |                     |            |             |                               |  |
| <b>Replicate1.</b> | <b>Plau Ct</b>  | <b>Plau Ct mean</b>  | <b>RPL7 Ct</b> | <b>RPL7 Ct mean</b> | <b>ΔCt</b> | <b>ΔΔCt</b> | <b>RQ(2<sup>^-ΔΔCt</sup>)</b> |  |
| TS                 | 28.91           | 28.91                | 15.27          | 15.27               | 13.64      | 0           | 1                             |  |
|                    | 28.92           |                      | 15.28          |                     |            |             |                               |  |
|                    | 28.9            |                      | 15.26          |                     |            |             |                               |  |
| Diff               | 29.71           | 29.72                | 15.51          | 15.51666667         | 14.20333   | 0.563333    | <b>0.676736762</b>            |  |
|                    | 29.7            |                      | 15.54          |                     |            |             |                               |  |
|                    | 29.75           |                      | 15.5           |                     |            |             |                               |  |

Cont.

**A.**

| <b>Replicate2.</b> | <b>Plau Ct</b> | <b>Plau Ct mean</b> | <b>RPL7 Ct</b> | <b>RPL7 Ct mean</b> | <b>ΔCt</b> | <b>ΔΔCt</b> | <b>RQ(2<sup>-ΔΔCt</sup>)</b> |
|--------------------|----------------|---------------------|----------------|---------------------|------------|-------------|------------------------------|
| TS                 | 28.84          | 28.84               | 15.29          | 15.29               | 13.55      | 0           | 1                            |
|                    | 28.86          |                     | 15.3           |                     |            |             |                              |
|                    | 28.82          |                     | 15.28          |                     |            |             |                              |

|      |       |             |       |             |          |          |                    |
|------|-------|-------------|-------|-------------|----------|----------|--------------------|
| Diff | 29.77 | 29.77666667 | 15.44 | 15.43333333 | 14.34333 | 0.793333 | <b>0.577009376</b> |
|      | 29.79 |             | 15.4  |             |          |          |                    |
|      | 29.77 |             | 15.46 |             |          |          |                    |

| <b>Replicate3.</b> | <b>Plau Ct</b> | <b>Plau Ct mean</b> | <b>RPL7 Ct</b> | <b>RPL7 Ct mean</b> | <b>ΔCt</b> | <b>ΔΔCt</b> | <b>RQ(2<sup>-ΔΔCt</sup>)</b> |
|--------------------|----------------|---------------------|----------------|---------------------|------------|-------------|------------------------------|
| TS                 | 28.76          | 28.75333333         | 15.33          | 15.32333333         | 13.43      | 0           | 1                            |
|                    | 28.74          |                     | 15.3           |                     |            |             |                              |
|                    | 28.76          |                     | 15.34          |                     |            |             |                              |

|      |       |             |       |       |          |          |                    |
|------|-------|-------------|-------|-------|----------|----------|--------------------|
| Diff | 29.44 | 29.44666667 | 15.86 | 15.86 | 13.58667 | 0.156667 | <b>0.897095409</b> |
|      | 29.48 |             | 15.88 |       |          |          |                    |
|      | 29.42 |             | 15.84 |       |          |          |                    |

| <b>Replicate1.</b> | <b>Kdr Ct</b> | <b>Kdr Ct mean</b> | <b>RPL7 Ct</b> | <b>RPL7 Ct mean</b> | <b>ΔCt</b> | <b>ΔΔCt</b> | <b>RQ(2<sup>-ΔΔCt</sup>)</b> |
|--------------------|---------------|--------------------|----------------|---------------------|------------|-------------|------------------------------|
| TS                 | 23.22         | 23.22              | 15.34          | 15.32               | 7.9        | 0           | 1                            |
|                    | 23.2          |                    | 15.3           |                     |            |             |                              |
|                    | 23.24         |                    | 15.32          |                     |            |             |                              |

|      |       |       |       |       |       |      |                    |
|------|-------|-------|-------|-------|-------|------|--------------------|
| Diff | 26.33 | 26.32 | 15.96 | 15.96 | 10.36 | 2.46 | <b>0.181746565</b> |
|      | 26.3  |       | 15.98 |       |       |      |                    |
|      | 26.33 |       | 15.94 |       |       |      |                    |

| <b>Replicate2.</b> | <b>Kdr Ct</b> | <b>Kdr Ct mean</b> | <b>RPL7 Ct</b> | <b>RPL7 Ct mean</b> | <b>ΔCt</b> | <b>ΔΔCt</b> | <b>RQ(2<sup>-ΔΔCt</sup>)</b> |
|--------------------|---------------|--------------------|----------------|---------------------|------------|-------------|------------------------------|
| TS                 | 23.21         | 23.21              | 15.4           | 15.44666667         | 7.763333   | 0           | 1                            |
|                    | 23.22         |                    | 15.46          |                     |            |             |                              |
|                    | 23.2          |                    | 15.48          |                     |            |             |                              |

|      |       |             |       |             |       |          |                    |
|------|-------|-------------|-------|-------------|-------|----------|--------------------|
| Diff | 26.38 | 26.35333333 | 15.98 | 15.98333333 | 10.37 | 2.606667 | <b>0.164178069</b> |
|      | 26.36 |             | 15.99 |             |       |          |                    |
|      | 26.32 |             | 15.98 |             |       |          |                    |

| <b>Replicate3.</b> | <b>Kdr Ct</b> | <b>Kdr Ct mean</b> | <b>RPL7 Ct</b> | <b>RPL7 Ct mean</b> | <b>ΔCt</b> | <b>ΔΔCt</b> | <b>RQ(2<sup>-ΔΔCt</sup>)</b> |
|--------------------|---------------|--------------------|----------------|---------------------|------------|-------------|------------------------------|
| TS                 | 23.41         | 23.44666667        | 15.3           | 15.32               | 8.126667   | 0           | 1                            |
|                    | 23.45         |                    | 15.34          |                     |            |             |                              |
|                    | 23.48         |                    | 15.32          |                     |            |             |                              |

|      |       |             |       |       |          |      |                    |
|------|-------|-------------|-------|-------|----------|------|--------------------|
| Diff | 26.4  | 26.44666667 | 15.97 | 15.97 | 10.47667 | 2.35 | <b>0.196146024</b> |
|      | 26.48 |             | 15.98 |       |          |      |                    |
|      | 26.46 |             | 15.96 |       |          |      |                    |

**B.**

| <b>Replicate1.</b> | <b>Cdh5 Ct</b>   | <b>Cdh5 Ct mean</b>   | <b>RPL7 Ct</b> | <b>RPL7 Ct mean</b> | <b>ΔCt</b> | <b>ΔΔCt</b> | <b>RQ(2<sup>Δ-ΔCt</sup>)</b> |
|--------------------|------------------|-----------------------|----------------|---------------------|------------|-------------|------------------------------|
| TS                 | 27.92            | 27.94666667           | 15.93          | 15.94333333         | 12.00333   | 0           | 1                            |
|                    | 27.94            |                       | 15.94          |                     |            |             |                              |
|                    | 27.98            |                       | 15.96          |                     |            |             |                              |
| Diff               | 20.79            | 20.78333333           | 16.4           | 16.41               | 4.373333   | -7.63       | 198.0883192                  |
|                    | 20.77            |                       | 16.43          |                     |            |             |                              |
|                    | 20.79            |                       | 16.4           |                     |            |             |                              |
| <b>Replicate2.</b> | <b>Cdh5 Ct</b>   | <b>Cdh5 Ct mean</b>   | <b>RPL7 Ct</b> | <b>RPL7 Ct mean</b> | <b>ΔCt</b> | <b>ΔΔCt</b> | <b>RQ(2<sup>Δ-ΔCt</sup>)</b> |
| TS                 | 27.76            | 27.75333333           | 15.91          | 15.92               | 11.83333   | 0           | 1                            |
|                    | 27.72            |                       | 15.95          |                     |            |             |                              |
|                    | 27.78            |                       | 15.9           |                     |            |             |                              |
| Diff               | 20.77            | 20.77333333           | 16.48          | 16.47333333         | 4.3        | -7.53333    | 185.2504624                  |
|                    | 20.78            |                       | 16.46          |                     |            |             |                              |
|                    | 20.77            |                       | 16.48          |                     |            |             |                              |
| <b>Replicate3.</b> | <b>Cdh5 Ct</b>   | <b>Cdh5 Ct mean</b>   | <b>RPL7 Ct</b> | <b>RPL7 Ct mean</b> | <b>ΔCt</b> | <b>ΔΔCt</b> | <b>RQ(2<sup>Δ-ΔCt</sup>)</b> |
| TS                 | 28.27            | 28.27666667           | 15.95          | 15.93               | 12.34667   | 0           | 1                            |
|                    | 28.3             |                       | 15.94          |                     |            |             |                              |
|                    | 28.26            |                       | 15.9           |                     |            |             |                              |
| Diff               | 20.75            | 20.74333333           | 16             | 16.08333333         | 4.66       | -7.68667    | 206.0237241                  |
|                    | 20.76            |                       | 16.1           |                     |            |             |                              |
|                    | 20.72            |                       | 16.15          |                     |            |             |                              |
| <b>Replicate1.</b> | <b>Pecam1 Ct</b> | <b>Pecam1 Ct mean</b> | <b>RPL7 Ct</b> | <b>RPL7 Ct mean</b> | <b>ΔCt</b> | <b>ΔΔCt</b> | <b>RQ(2<sup>Δ-ΔCt</sup>)</b> |
| TS                 | 24.72            | 24.74                 | 15.43          | 15.42666667         | 9.313333   | 0           | 1                            |
|                    | 24.74            |                       | 15.42          |                     |            |             |                              |
|                    | 24.76            |                       | 15.43          |                     |            |             |                              |
| Diff               | 22.44            | 22.42                 | 15.95          | 15.94333333         | 6.476667   | -2.83667    | 7.143676088                  |
|                    | 22.4             |                       | 15.95          |                     |            |             |                              |
|                    | 22.42            |                       | 15.93          |                     |            |             |                              |
| <b>Replicate2.</b> | <b>Pecam1 Ct</b> | <b>Pecam1 Ct mean</b> | <b>RPL7 Ct</b> | <b>RPL7 Ct mean</b> | <b>ΔCt</b> | <b>ΔΔCt</b> | <b>RQ(2<sup>Δ-ΔCt</sup>)</b> |
| TS                 | 24.91            | 24.91                 | 15.42          | 15.41333333         | 9.496667   | 0           | 1                            |
|                    | 24.92            |                       | 15.42          |                     |            |             |                              |
|                    | 24.9             |                       | 15.4           |                     |            |             |                              |
| Diff               | 22.53            | 22.53                 | 15.9           | 15.92666667         | 6.603333   | -2.89333    | 7.42985128                   |
|                    | 22.54            |                       | 15.94          |                     |            |             |                              |
|                    | 22.52            |                       | 15.94          |                     |            |             |                              |

Cont

**B.**

| <b>Replicate3.</b> | <b>Pecam1 Ct</b>  | <b>Pecam1 Ct mean</b>  | <b>RPL7 Ct</b> | <b>RPL7 Ct mean</b> | <b>ΔCt</b> | <b>ΔΔCt</b> | <b>RQ(2<sup>^-ΔΔCt</sup>)</b> |                    |
|--------------------|-------------------|------------------------|----------------|---------------------|------------|-------------|-------------------------------|--------------------|
| TS                 | 24.97             | 24.97333333            | 15.24          | 15.21333333         | 9.76       |             | 0                             | 1                  |
|                    | 24.98             |                        | 15.2           |                     |            |             |                               |                    |
|                    | 24.97             |                        | 15.2           |                     |            |             |                               |                    |
| Diff               | 22.51             | 22.51                  | 15.96          | 15.95333333         | 6.556667   | -3.20333    |                               | <b>9.210843842</b> |
|                    | 22.5              |                        | 15.94          |                     |            |             |                               |                    |
|                    | 22.52             |                        | 15.96          |                     |            |             |                               |                    |
| <b>Replicate1.</b> | <b>Itgβ3 Ct</b>   | <b>Itgβ3 Ct mean</b>   | <b>RPL7 Ct</b> | <b>RPL7 Ct mean</b> | <b>ΔCt</b> | <b>ΔΔCt</b> | <b>RQ(2<sup>^-ΔΔCt</sup>)</b> |                    |
| TS                 | 28.58             | 28.57333333            | 15             | 15.08666667         | 13.48667   |             | 0                             | 1                  |
|                    | 28.56             |                        | 15.12          |                     |            |             |                               |                    |
|                    | 28.58             |                        | 15.14          |                     |            |             |                               |                    |
| Diff               | 21.72             | 21.74                  | 15.9           | 15.92               | 5.82       | -7.66667    |                               | <b>203.1873347</b> |
|                    | 21.74             |                        | 15.92          |                     |            |             |                               |                    |
|                    | 21.76             |                        | 15.94          |                     |            |             |                               |                    |
| <b>Replicate2.</b> | <b>Itgβ3 Ct</b>   | <b>Itgβ3 Ct mean</b>   | <b>RPL7 Ct</b> | <b>RPL7 Ct mean</b> | <b>ΔCt</b> | <b>ΔΔCt</b> | <b>RQ(2<sup>^-ΔΔCt</sup>)</b> |                    |
| TS                 | 28.64             | 28.64                  | 15.88          | 15.88               | 12.76      |             | 0                             | 1                  |
|                    | 28.66             |                        | 15.86          |                     |            |             |                               |                    |
|                    | 28.62             |                        | 15.9           |                     |            |             |                               |                    |
| Diff               | 21.4              | 21.42                  | 16.4           | 16.42               | 5          | -7.76       |                               | <b>216.7668</b>    |
|                    | 21.42             |                        | 16.42          |                     |            |             |                               |                    |
|                    | 21.44             |                        | 16.44          |                     |            |             |                               |                    |
| <b>Replicate3.</b> | <b>Itgβ3 Ct</b>   | <b>Itgβ3 Ct mean</b>   | <b>RPL7 Ct</b> | <b>RPL7 Ct mean</b> | <b>ΔCt</b> | <b>ΔΔCt</b> | <b>RQ(2<sup>^-ΔΔCt</sup>)</b> |                    |
| TS                 | 28.4              | 28.40666667            | 15.2           | 15.16666667         | 13.24      |             | 0                             | 1                  |
|                    | 28.42             |                        | 15.2           |                     |            |             |                               |                    |
|                    | 28.4              |                        | 15.1           |                     |            |             |                               |                    |
| Diff               | 21.24             | 21.25666667            | 15.96          | 15.95333333         | 5.303333   | -7.93667    |                               | <b>245.0048786</b> |
|                    | 21.3              |                        | 15.94          |                     |            |             |                               |                    |
|                    | 21.23             |                        | 15.96          |                     |            |             |                               |                    |
| <b>Replicate1.</b> | <b>Col18a1 Ct</b> | <b>Col18a1 Ct mean</b> | <b>RPL7 Ct</b> | <b>RPL7 Ct mean</b> | <b>ΔCt</b> | <b>ΔΔCt</b> | <b>RQ(2<sup>^-ΔΔCt</sup>)</b> |                    |
| TS                 | 24.99             | 24.98666667            | 15             | 15.14666667         | 9.84       |             | 0                             | 1                  |
|                    | 24.98             |                        | 15.2           |                     |            |             |                               |                    |
|                    | 24.99             |                        | 15.24          |                     |            |             |                               |                    |
| Diff               | 28.96             | 27.60666667            | 15.4           | 15.41               | 12.19667   | 2.356667    |                               | <b>0.195241728</b> |
|                    | 28.94             |                        | 15.42          |                     |            |             |                               |                    |
|                    | 24.92             |                        | 15.41          |                     |            |             |                               |                    |

Cont

**B.**

| <b>Replicate2.</b> | <b>Col18a1 Ct</b> | <b>Col18a1 Ct mean</b> | <b>RPL7 Ct</b> | <b>RPL7 Ct mean</b> | <b>ΔCt</b> | <b>ΔΔCt</b> | <b>RQ(2<sup>-ΔΔCt</sup>)</b> |
|--------------------|-------------------|------------------------|----------------|---------------------|------------|-------------|------------------------------|
| TS                 | 24.96             | 24.94                  | 15.3           | 15.30666667         | 9.633333   | 0           | 1                            |
|                    | 24.94             |                        | 15.32          |                     |            |             |                              |
|                    | 24.92             |                        | 15.3           |                     |            |             |                              |

|      |       |       |       |       |       |          |                    |
|------|-------|-------|-------|-------|-------|----------|--------------------|
| Diff | 28.97 | 28.97 | 15.9  | 15.91 | 13.06 | 3.426667 | <b>0.092997345</b> |
|      | 28.98 |       | 15.92 |       |       |          |                    |
|      | 28.96 |       | 15.91 |       |       |          |                    |

| <b>Replicate3.</b> | <b>Col18a1 Ct</b> | <b>Col18a1 Ct mean</b> | <b>RPL7 Ct</b> | <b>RPL7 Ct mean</b> | <b>ΔCt</b> | <b>ΔΔCt</b> | <b>RQ(2<sup>-ΔΔCt</sup>)</b> |
|--------------------|-------------------|------------------------|----------------|---------------------|------------|-------------|------------------------------|
| TS                 | 25                | 25.1                   | 15.4           | 15.40666667         | 9.693333   | 0           | 1                            |
|                    | 25.2              |                        | 15.42          |                     |            |             |                              |
|                    | 25.1              |                        | 15.4           |                     |            |             |                              |

|      |       |             |       |       |          |          |                    |
|------|-------|-------------|-------|-------|----------|----------|--------------------|
| Diff | 29    | 29.11666667 | 15.8  | 15.81 | 13.30667 | 3.613333 | <b>0.081710578</b> |
|      | 29.2  |             | 15.82 |       |          |          |                    |
|      | 29.15 |             | 15.81 |       |          |          |                    |

**C.**

| <b>Replicate1.</b> | <b>Tnsf10 Ct</b> | <b>Tnsf10 Ct mean</b> | <b>RPL7 Ct</b> | <b>RPL7 Ct mean</b> | <b>ΔCt</b> | <b>ΔΔCt</b> | <b>RQ(2<sup>-ΔΔCt</sup>)</b> |
|--------------------|------------------|-----------------------|----------------|---------------------|------------|-------------|------------------------------|
| TS                 | 31               | 31.14666667           | 15.21          | 15.212              | 15.93467   | 0           | 1                            |
|                    | 31.2             |                       | 15.212         |                     |            |             |                              |
|                    | 31.24            |                       | 15.214         |                     |            |             |                              |

|      |      |             |       |             |      |          |                    |
|------|------|-------------|-------|-------------|------|----------|--------------------|
| Diff | 17   | 17.06666667 | 15.28 | 15.27666667 | 1.79 | -14.1447 | <b>18112.10576</b> |
|      | 17.2 |             | 15.27 |             |      |          |                    |
|      | 17   |             | 15.28 |             |      |          |                    |

| <b>Replicate2.</b> | <b>Tnsf10 Ct</b> | <b>Tnsf10 Ct mean</b> | <b>RPL7 Ct</b> | <b>RPL7 Ct mean</b> | <b>ΔCt</b> | <b>ΔΔCt</b> | <b>RQ(2<sup>-ΔΔCt</sup>)</b> |
|--------------------|------------------|-----------------------|----------------|---------------------|------------|-------------|------------------------------|
| TS                 | 32               | 32.03333333           | 15             | 15.07333333         | 16.96      | 0           | 1                            |
|                    | 32               |                       | 15.1           |                     |            |             |                              |
|                    | 32.1             |                       | 15.12          |                     |            |             |                              |

|      |       |             |       |       |          |          |                    |
|------|-------|-------------|-------|-------|----------|----------|--------------------|
| Diff | 18    | 18.07333333 | 15.9  | 15.91 | 2.163333 | -14.7967 | <b>28460.36742</b> |
|      | 18.1  |             | 15.92 |       |          |          |                    |
|      | 18.12 |             | 15.91 |       |          |          |                    |

| <b>Replicate3.</b> | <b>Tnsf10 Ct</b> | <b>Tnsf10 Ct mean</b> | <b>RPL7 Ct</b> | <b>RPL7 Ct mean</b> | <b>ΔCt</b> | <b>ΔΔCt</b> | <b>RQ(2<sup>-ΔΔCt</sup>)</b> |
|--------------------|------------------|-----------------------|----------------|---------------------|------------|-------------|------------------------------|
| TS                 | 31.7             | 31.70666667           | 15.3           | 15.32666667         | 16.38      | 0           | 1                            |
|                    | 31.72            |                       | 15.36          |                     |            |             |                              |
|                    | 31.7             |                       | 15.32          |                     |            |             |                              |

|      |       |             |       |             |          |          |                   |
|------|-------|-------------|-------|-------------|----------|----------|-------------------|
| Diff | 17.64 | 17.62666667 | 15.4  | 15.40333333 | 2.223333 | -14.1567 | <b>18263.3863</b> |
|      | 17.6  |             | 15.41 |             |          |          |                   |
|      | 17.64 |             | 15.4  |             |          |          |                   |

**C.**

| <b>Replicate1.</b> | <b>Bcl2 Ct</b>  | <b>Bcl2 Ct mean</b>  | <b>RPL7 Ct</b> | <b>RPL7 Ct mean</b> | <b>ΔCt</b> | <b>ΔΔCt</b> | <b>RQ(2<sup>ΔΔCt</sup>)</b> |
|--------------------|-----------------|----------------------|----------------|---------------------|------------|-------------|-----------------------------|
| TS                 | 28.15           | 28.15333333          | 14.57          | 14.57333333         | 13.58      | 0           | 1                           |
|                    | 28.16           |                      | 14.57          |                     |            |             |                             |
|                    | 28.15           |                      | 14.58          |                     |            |             |                             |
| Diff               | 29.83           | 29.82666667          | 14.87          | 14.87               | 14.95667   | 1.376667    | 0.385107556                 |
|                    | 29.82           |                      | 14.88          |                     |            |             |                             |
|                    | 29.83           |                      | 14.86          |                     |            |             |                             |
| <b>Replicate2.</b> | <b>Bcl2 Ct</b>  | <b>Bcl2 Ct mean</b>  | <b>RPL7 Ct</b> | <b>RPL7 Ct mean</b> | <b>ΔCt</b> | <b>ΔΔCt</b> | <b>RQ(2<sup>ΔΔCt</sup>)</b> |
| TS                 | 28.37           | 28.37                | 14.65          | 14.65333333         | 13.71667   | 0           | 1                           |
|                    | 28.38           |                      | 14.66          |                     |            |             |                             |
|                    | 28.36           |                      | 14.65          |                     |            |             |                             |
| Diff               | 29.92           | 29.91666667          | 14.86          | 14.86666667         | 15.05      | 1.333333    | 0.396850263                 |
|                    | 29.91           |                      | 14.86          |                     |            |             |                             |
|                    | 29.92           |                      | 14.88          |                     |            |             |                             |
| <b>Replicate3.</b> | <b>Bcl2 Ct</b>  | <b>Bcl2 Ct mean</b>  | <b>RPL7 Ct</b> | <b>RPL7 Ct mean</b> | <b>ΔCt</b> | <b>ΔΔCt</b> | <b>RQ(2<sup>ΔΔCt</sup>)</b> |
| TS                 | 28.36           | 28.35333333          | 14.6           | 14.61               | 13.74333   | 0           | 1                           |
|                    | 28.34           |                      | 14.62          |                     |            |             |                             |
|                    | 28.36           |                      | 14.61          |                     |            |             |                             |
| Diff               | 29.91           | 29.90666667          | 14.85          | 14.84333333         | 15.06333   | 1.32        | 0.400534939                 |
|                    | 29.9            |                      | 14.83          |                     |            |             |                             |
|                    | 29.91           |                      | 14.85          |                     |            |             |                             |
| <b>Replicate1.</b> | <b>Cradd Ct</b> | <b>Cradd Ct mean</b> | <b>RPL7 Ct</b> | <b>RPL7 Ct mean</b> | <b>ΔCt</b> | <b>ΔΔCt</b> | <b>RQ(2<sup>ΔΔCt</sup>)</b> |
| TS                 | 26.9            | 26.86333333          | 15.43          | 15.43333333         | 11.43      | 0           | 1                           |
|                    | 26.8            |                      | 15.44          |                     |            |             |                             |
|                    | 26.89           |                      | 15.43          |                     |            |             |                             |
| Diff               | 28.28           | 28.27333333          | 15.99          | 15.98666667         | 12.28667   | 0.856667    | 0.552227                    |
|                    | 28.26           |                      | 15.98          |                     |            |             |                             |
|                    | 28.28           |                      | 15.99          |                     |            |             |                             |
| <b>Replicate2.</b> | <b>Cradd Ct</b> | <b>Cradd Ct mean</b> | <b>RPL7 Ct</b> | <b>RPL7 Ct mean</b> | <b>ΔCt</b> | <b>ΔΔCt</b> | <b>RQ(2<sup>ΔΔCt</sup>)</b> |
| TS                 | 27              | 27.07333333          | 15.48          | 15.14               | 11.93333   | 0           | 1                           |
|                    | 27.1            |                      | 15.46          |                     |            |             |                             |
|                    | 27.12           |                      | 14.48          |                     |            |             |                             |
| Diff               | 28.29           | 28.29                | 15.94          | 15.94333333         | 12.34667   | 0.413333    | 0.750886452                 |
|                    | 28.28           |                      | 15.95          |                     |            |             |                             |
|                    | 28.3            |                      | 15.94          |                     |            |             |                             |

Cont

**C.**

| <b>Replicate3.</b> | <b>Cradd Ct</b> | <b>Cradd Ct mean</b> | <b>RPL7 Ct</b> | <b>RPL7 Ct mean</b> | <b>ΔCt</b> | <b>ΔΔCt</b> | <b>RQ(2<sup>-ΔΔCt</sup>)</b> |
|--------------------|-----------------|----------------------|----------------|---------------------|------------|-------------|------------------------------|
| TS                 | 26.95           | 26.95                | 15.47          | 15.47333333         | 11.47667   | 0           | 1                            |
|                    | 26.94           |                      | 15.46          |                     |            |             |                              |
|                    | 26.96           |                      | 15.49          |                     |            |             |                              |
| Diff               | 28.36           | 28.36333333          | 15.5           | 15.50333333         | 12.86      | 1.383333    | <b>0.383332086</b>           |
|                    | 28.37           |                      | 15.51          |                     |            |             |                              |
|                    | 28.36           |                      | 15.5           |                     |            |             |                              |
| <b>Replicate1.</b> | <b>Casp3 Ct</b> | <b>Casp3 Ct mean</b> | <b>RPL7 Ct</b> | <b>RPL7 Ct mean</b> | <b>ΔCt</b> | <b>ΔΔCt</b> | <b>RQ(2<sup>-ΔΔCt</sup>)</b> |
| TS                 | 24.5            | 24.51                | 15.16          | 15.16333333         | 9.346667   | 0           | 1                            |
|                    | 24.52           |                      | 15.17          |                     |            |             |                              |
|                    | 24.51           |                      | 15.16          |                     |            |             |                              |
| Diff               | 26              | 26.01666667          | 15.86          | 15.86333333         | 10.15333   | 0.806667    | <b>0.571701243</b>           |
|                    | 26.03           |                      | 15.87          |                     |            |             |                              |
|                    | 26.02           |                      | 15.86          |                     |            |             |                              |
| <b>Replicate2.</b> | <b>Casp3 Ct</b> | <b>Casp3 Ct mean</b> | <b>RPL7 Ct</b> | <b>RPL7 Ct mean</b> | <b>ΔCt</b> | <b>ΔΔCt</b> | <b>RQ(2<sup>-ΔΔCt</sup>)</b> |
| TS                 | 24.92           | 24.94                | 15.18          | 15.17333333         | 9.766667   | 0           | 1                            |
|                    | 24.94           |                      | 15.16          |                     |            |             |                              |
|                    | 24.96           |                      | 15.18          |                     |            |             |                              |
| Diff               | 26.04           | 26.05                | 15.79          | 15.78666667         | 10.26333   | 0.496667    | <b>0.708742434</b>           |
|                    | 26.05           |                      | 15.8           |                     |            |             |                              |
|                    | 26.06           |                      | 15.77          |                     |            |             |                              |
| <b>Replicate3.</b> | <b>Casp3 Ct</b> | <b>Casp3 Ct mean</b> | <b>RPL7 Ct</b> | <b>RPL7 Ct mean</b> | <b>ΔCt</b> | <b>ΔΔCt</b> | <b>RQ(2<sup>-ΔΔCt</sup>)</b> |
| TS                 | 24.23           | 24.23                | 15.32          | 15.33               | 8.9        | 0           | 1                            |
|                    | 24.24           |                      | 15.34          |                     |            |             |                              |
|                    | 24.22           |                      | 15.33          |                     |            |             |                              |
| Diff               | 25.8            | 25.66666667          | 15.9           | 15.91               | 9.756667   | 0.856667    | <b>0.552227</b>              |
|                    | 25.6            |                      | 15.91          |                     |            |             |                              |
|                    | 25.6            |                      | 15.92          |                     |            |             |                              |
